# Supplementary figures and images for: Emergence of power law distributions in protein-protein interaction networks through study bias
Source: eLife journal article supplement (doi:10.7554/elife.99951), 2024-12-11

A

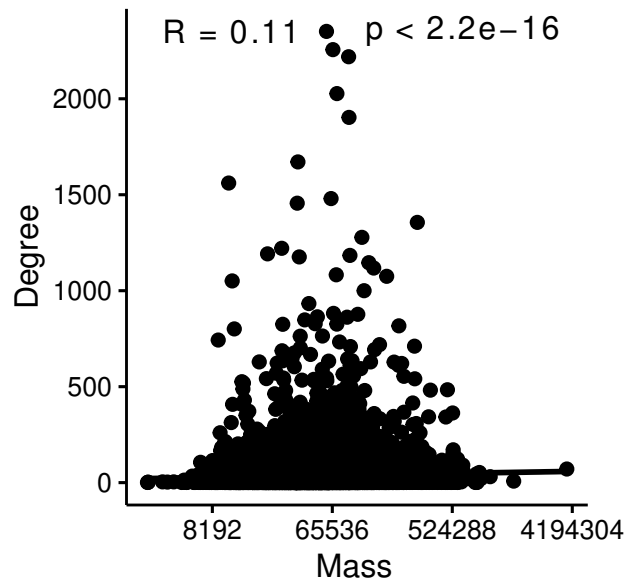

B

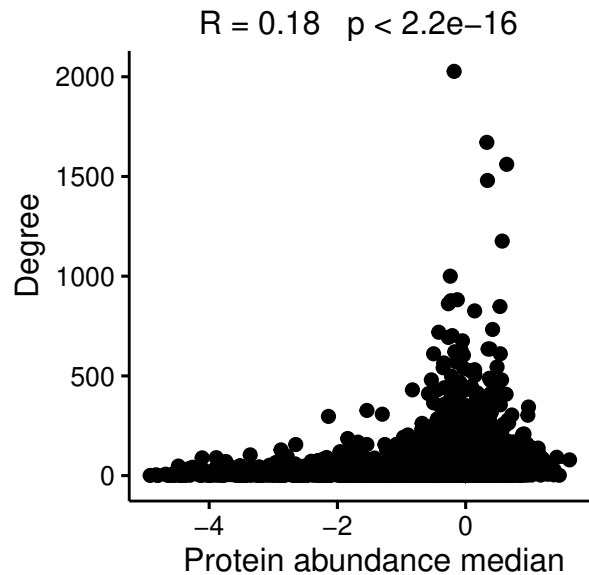

Supplement: supp [file elife-99951-supp-v1.zip]

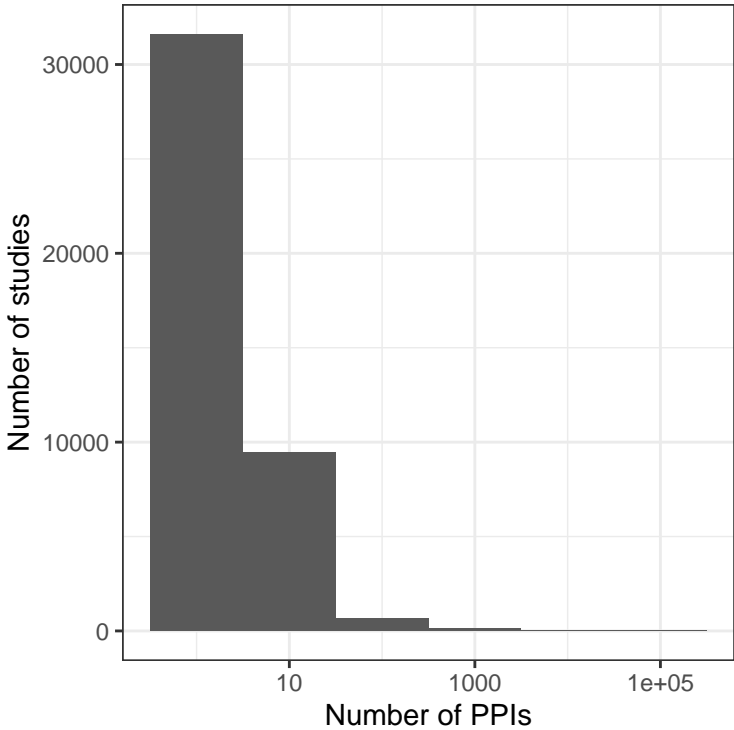

Supplement: supp [file elife-99951-supp-v1.zip]

A

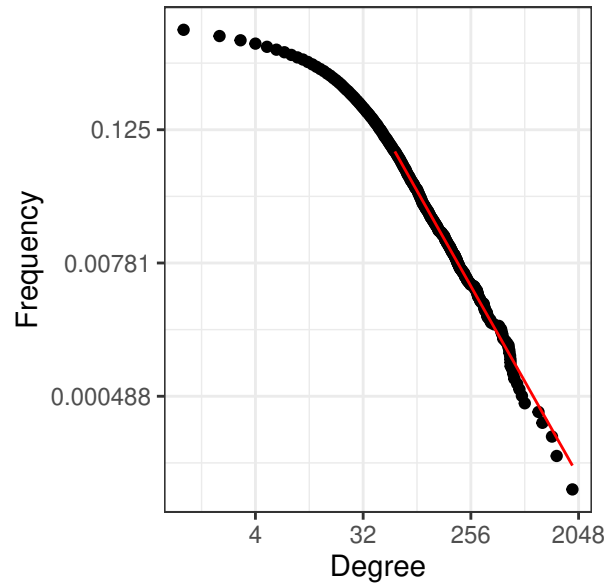

B

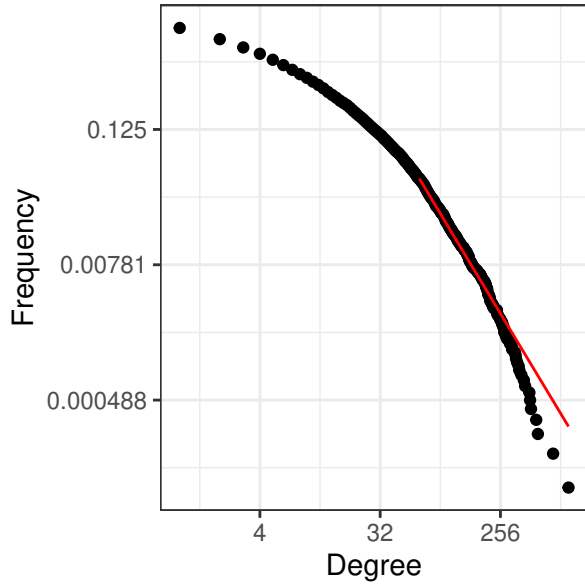

Supplement: supp [file elife-99951-supp-v1.zip]

# Reactome

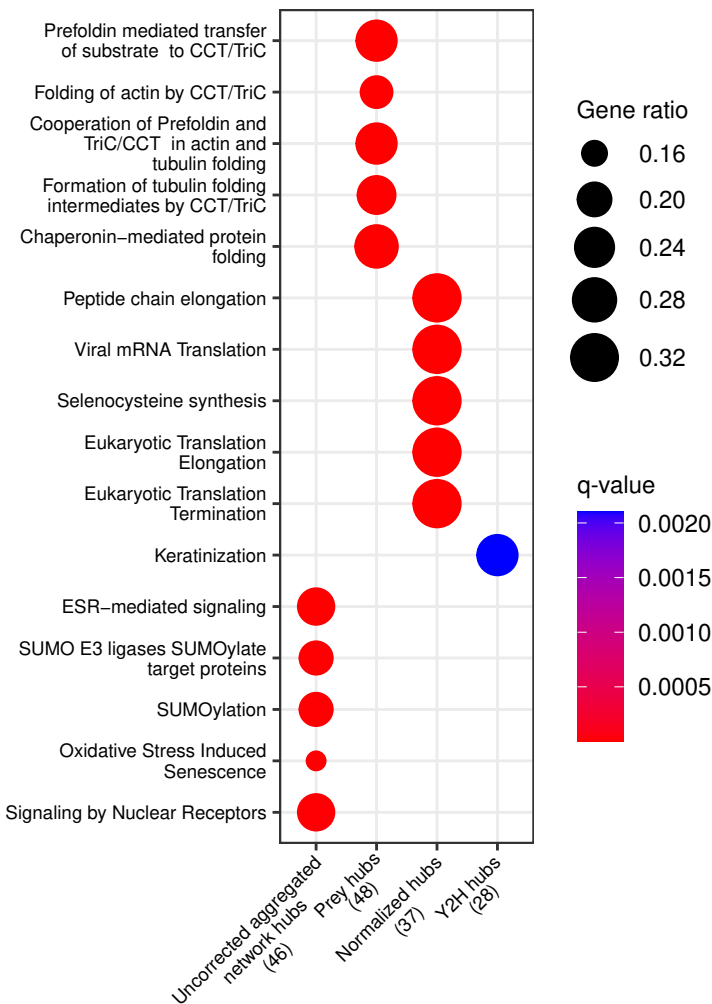

Supplement: supp [file elife-99951-supp-v1.zip]

**A**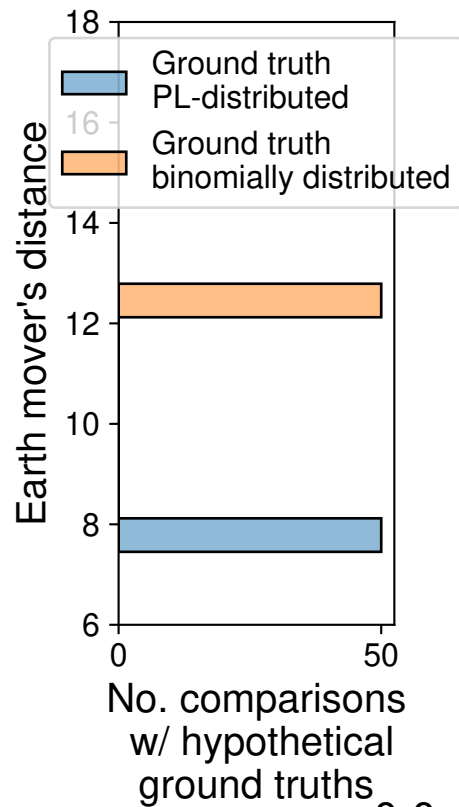**B**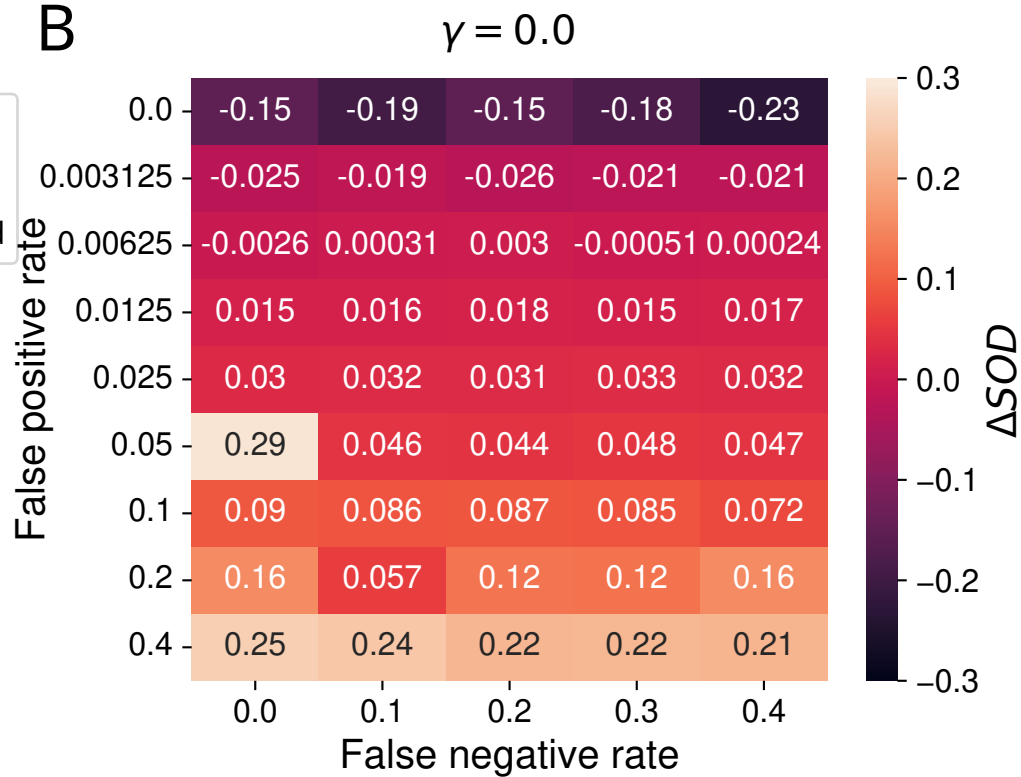**C**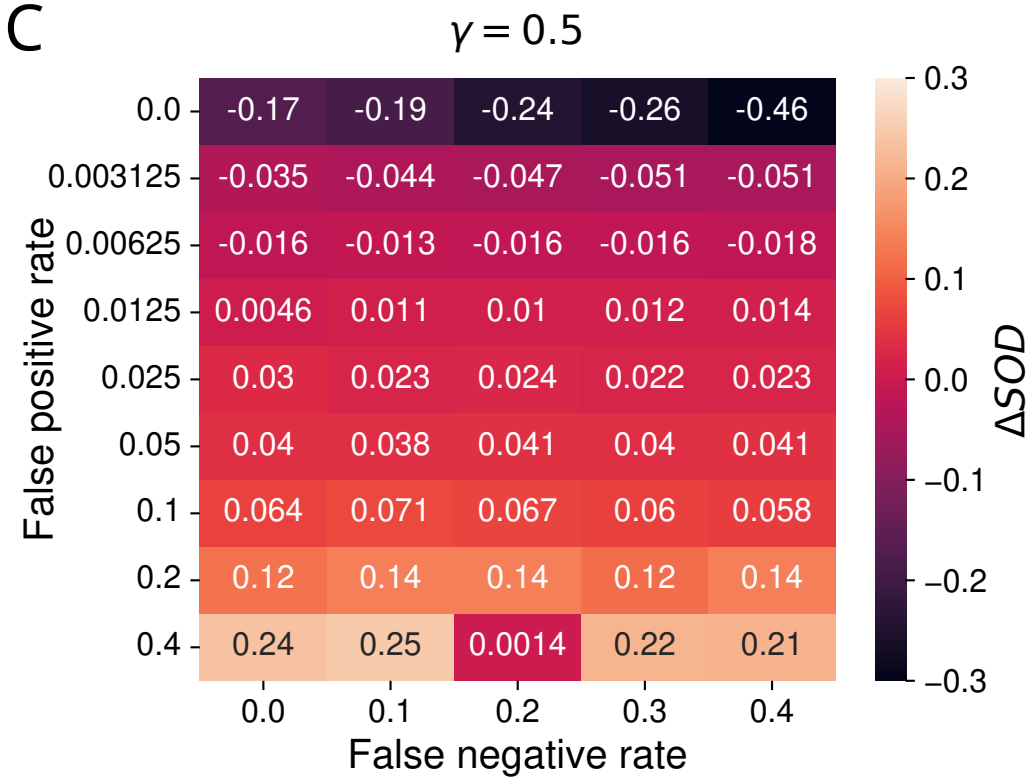**D**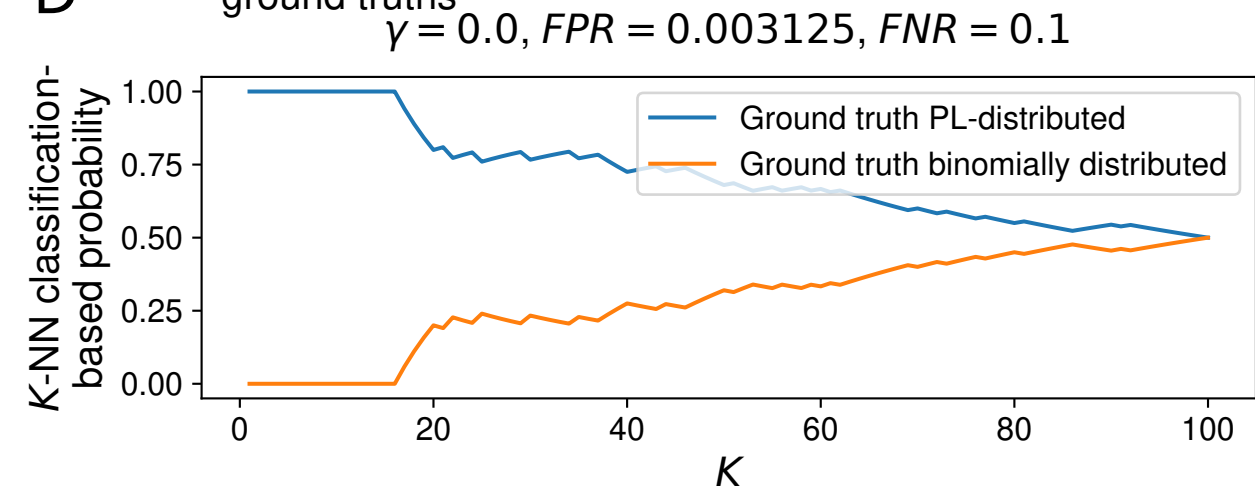**E**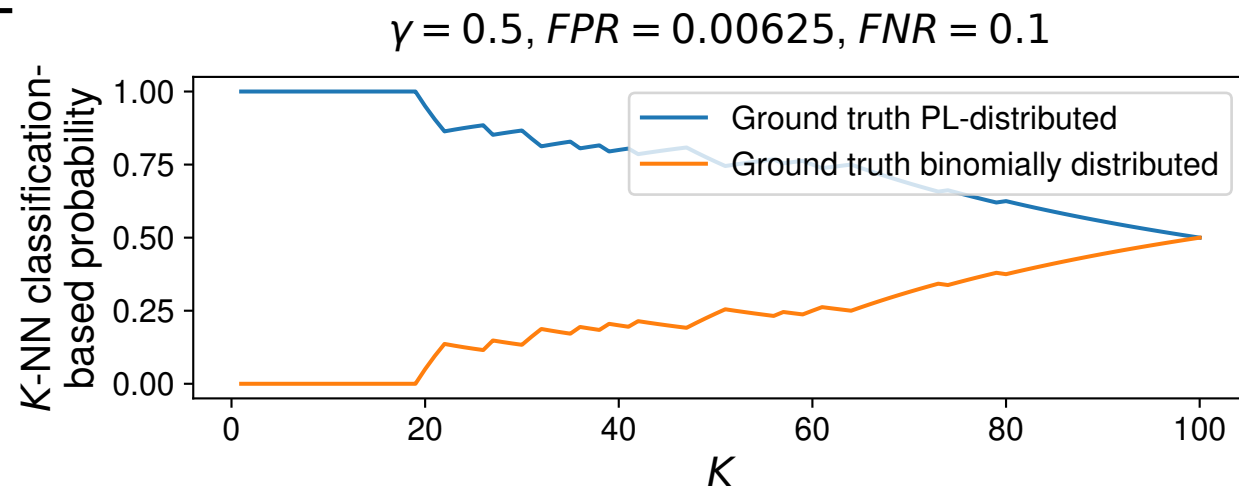**F**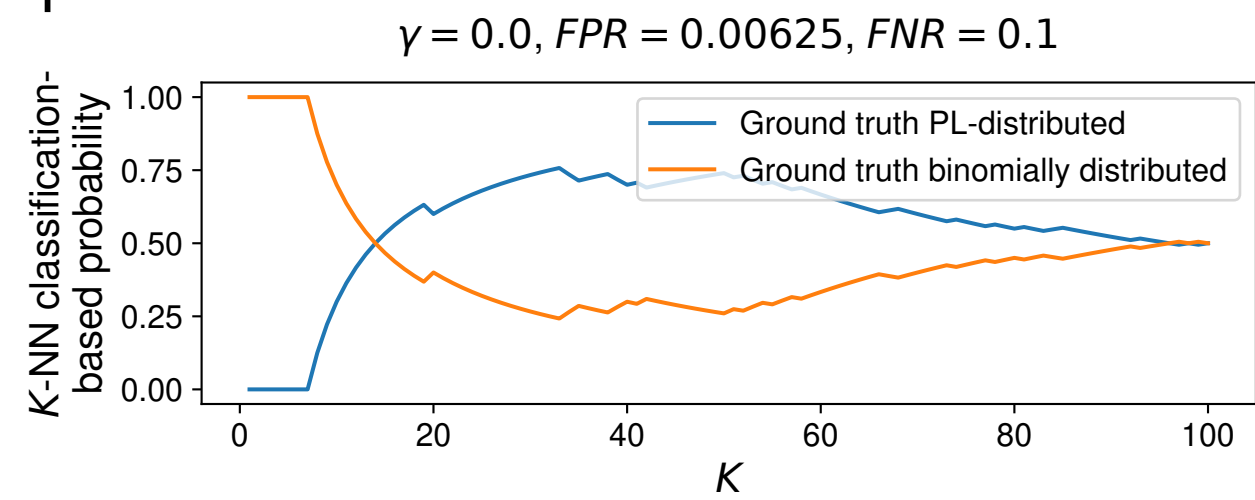**G**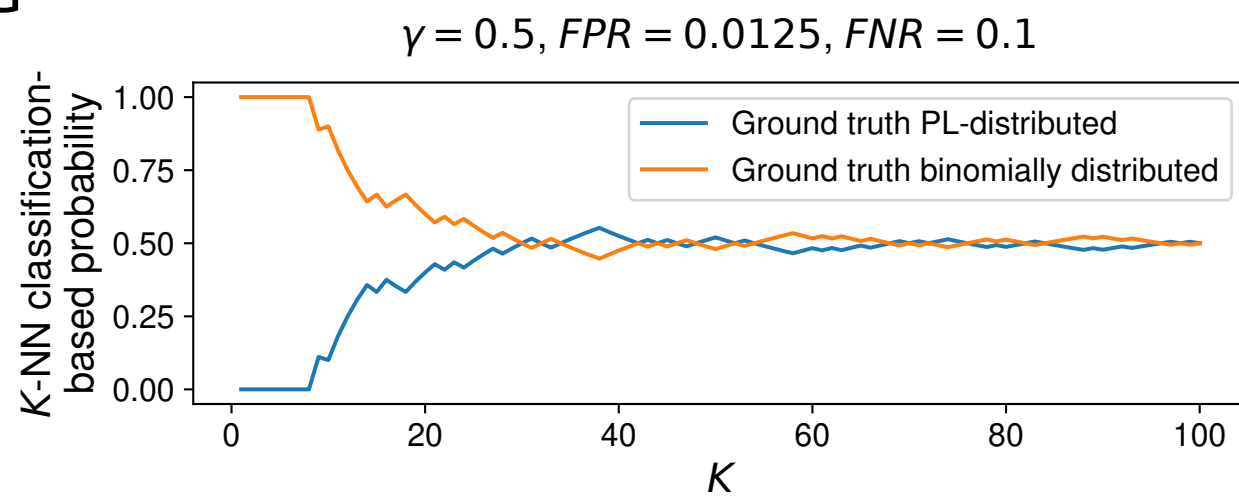

Supplement: supp [file elife-99951-supp-v1.zip]

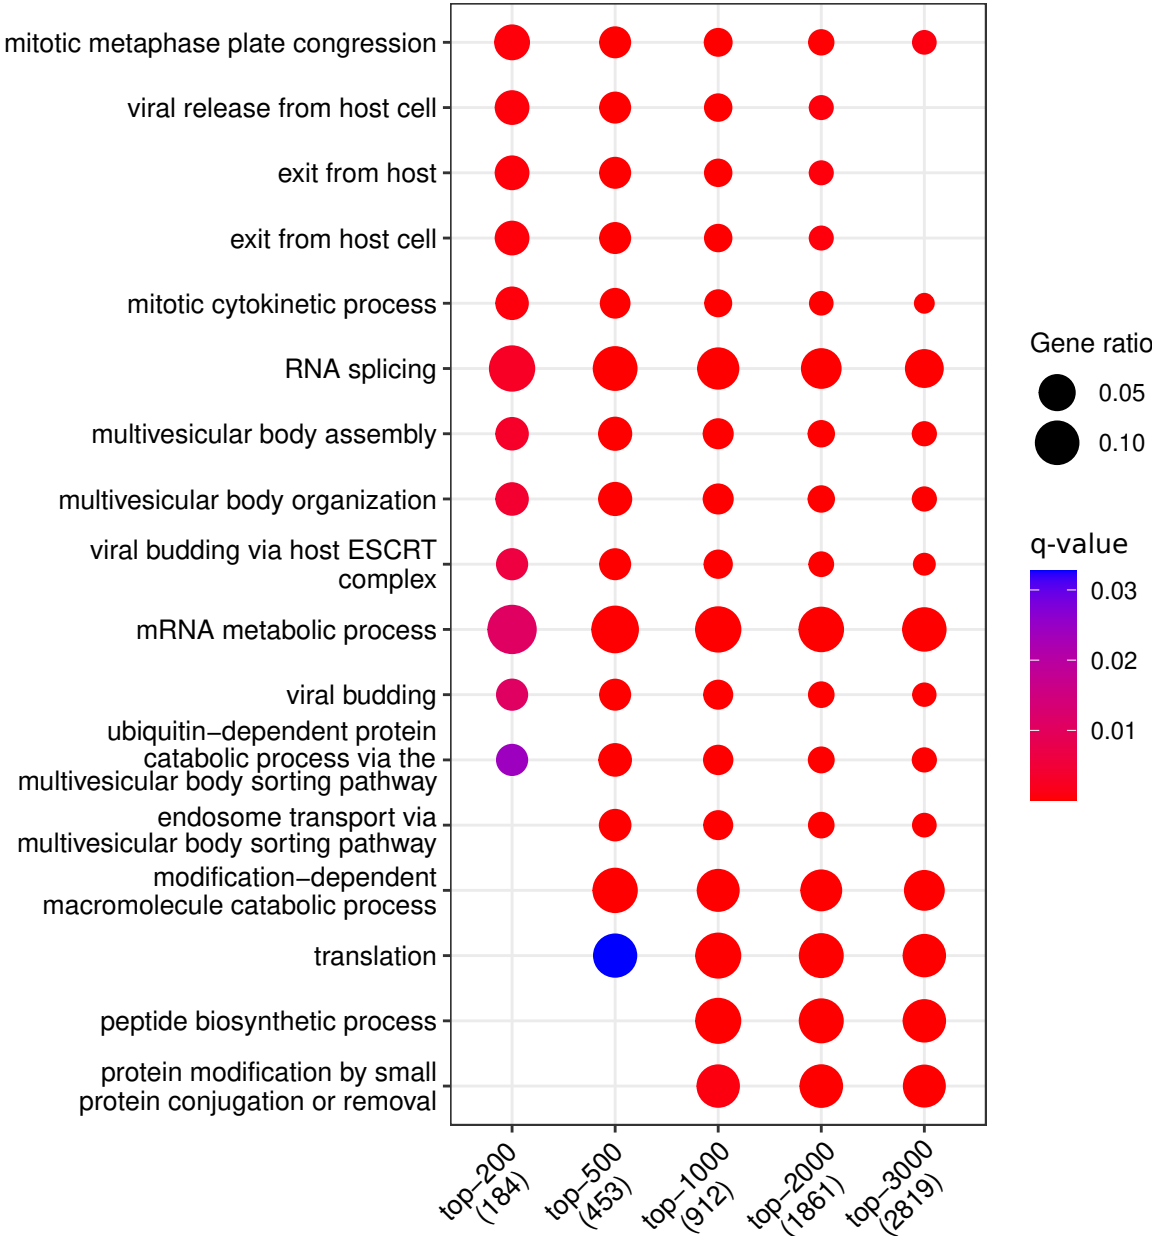

Supplement: supp [file elife-99951-supp-v1.zip]

A

Schizophrenia      Chaperones

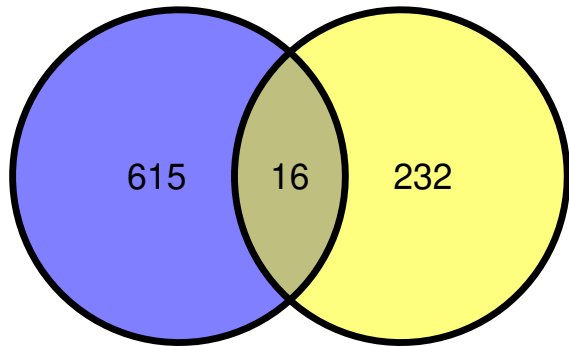

B

Psychotic disorder      Chaperones

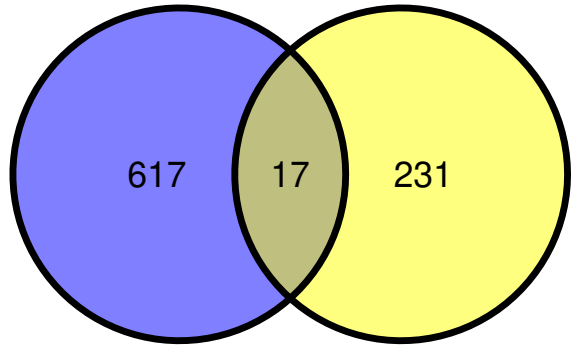

Supplement: supp [file elife-99951-supp-v1.zip]
